# Supplementary material for: Mechanistic insights into the mitigation of Aβ aggregation and protofibril destabilization by ad-enantiomeric decapeptide rk10
Source: Royal Society of Chemistry journal article supplement (doi:10.1039/d2cp02601e), 2022-01-01
Supplement: d2cp02601e1.pdf [file d2cp02601e1.pdf]

## Supporting Information

### **Mechanistic insights into the mitigation of A $\beta$ aggregation and protofibril destabilization by a D-enantiomeric decapeptide rk10**

Kamaljot Singh,<sup>[a]</sup> Anupamjeet Kaur,<sup>[a]</sup> Deepti Goyal<sup>\*[b]</sup> and Bhupesh Goyal<sup>\*[c]</sup>

[a] Department of Chemistry, Faculty of Basic and Applied Sciences, Sri Guru Granth Sahib World University, Fatehgarh Sahib-140406, Punjab, India

[b] Department of Chemistry, DAV College, Sector 10, Chandigarh-160011, India

[c] School of Chemistry & Biochemistry, Thapar Institute of Engineering & Technology, Patiala-147004, Punjab, India

\*Corresponding author

E-mail address: [deeptig@iitbombay.org](mailto:deeptig@iitbombay.org); [bhupesh@iitbombay.org](mailto:bhupesh@iitbombay.org)

## Table of contents

|                                                                                                                                                                                                                                                                                                                                                                                                                                                                                                     |     |
|-----------------------------------------------------------------------------------------------------------------------------------------------------------------------------------------------------------------------------------------------------------------------------------------------------------------------------------------------------------------------------------------------------------------------------------------------------------------------------------------------------|-----|
| <b>Figure S1:</b> Comparison of NMR data obtained from simulation ( $\delta_{\text{sim}}$ ) with experimental ( $\delta_{\text{exp}}$ ) for (a) C $\alpha$ chemical shift, (b) C $\beta$ chemical shift, (c) $^3J_{\text{NH-H}\alpha}$ coupling constants of A $\beta_{42}$ monomer, and (d) C $\alpha$ chemical shift, (e) C $\beta$ chemical shift, (f) $^3J_{\text{NH-H}\alpha}$ coupling constants of A $\beta_{42}$ protofibril.                                                               | S4  |
| <b>Figure S2:</b> The probability distribution graph of RMSD for A $\beta_{42}$ monomer and A $\beta_{42}$ monomer + rk10 complex.                                                                                                                                                                                                                                                                                                                                                                  | S5  |
| <b>Figure S3:</b> The RMSD of dual simulations for A $\beta_{42}$ monomer, A $\beta_{42}$ monomer + rk10 complex, A $\beta_{42}$ protofibril, and A $\beta_{42}$ protofibril + rk10 complex are shown in panel a, b, c, and d, respectively.                                                                                                                                                                                                                                                        | S6  |
| <b>Figure S4:</b> The evolution of secondary structure for A $\beta_{42}$ monomer (panel a) and A $\beta_{42}$ monomer + rk10 complex (panel b) during simulation. The X-axis represents simulation time in ns and Y-axis represents A $\beta_{42}$ residues. The colour-coded maps of secondary structure analysis for A $\beta_{42}$ monomer is shown underneath.                                                                                                                                 | S7  |
| <b>Figure S5:</b> The per-residue helix, $\beta$ -sheet percentage in A $\beta_{42}$ monomer and A $\beta_{42}$ monomer + rk10 complex are shown in panel a, and b, respectively.                                                                                                                                                                                                                                                                                                                   | S8  |
| <b>Figure S6:</b> The side chain-side chain contact maps between A $\beta_{42}$ monomer residues in the absence and presence of rk10 are shown in panel a, and b, respectively. In the presence of rk10, the contacts between Asp1-Val12 and Ser26-Ile41 residues of A $\beta_{42}$ monomer were significantly reduced as depicted with dotted rectangular boxes in panel b.                                                                                                                        | S9  |
| <b>Figure S7:</b> The representative conformations of the most-populated microstates of A $\beta_{42}$ monomer and A $\beta_{42}$ monomer + rk10 complex are shown in the cartoon representation with percentage populations in panel a, and b, respectively. The hydrogen bond and $\pi$ - $\pi$ interactions between A $\beta_{42}$ monomer and rk10 in the representative conformation of the most-populated microstate ( $m_1$ ) of A $\beta_{42}$ monomer + rk10 complex are shown in panel c. | S10 |
| <b>Figure S8:</b> The eigenvalues for the corresponding eigenvectors obtained from the principal component analysis of A $\beta_{42}$ monomer and protofibril structures in the absence and presence of rk10.                                                                                                                                                                                                                                                                                       | S11 |
| <b>Figure S9:</b> The RMSD for all four chains (A-D) of A $\beta_{42}$ protofibril and A $\beta_{42}$ protofibril + rk10 complex are shown in panel a, and b, respectively. The RMSF for all four chains (A-D) of A $\beta_{42}$ protofibril in the absence and presence of rk10 are shown in panel c, and d, respectively.                                                                                                                                                                         | S12 |
| <b>Figure S10:</b> The side chain-side chain contact maps between A $\beta_{42}$ protofibril chains in the absence and presence of rk10. The cut-off distance between atoms used to define contact is 1.5 nm. In the presence of rk10, the strong tertiary contacts between A $\beta_{42}$ protofibril residues were disrupted as depicted with dotted rectangular boxes.                                                                                                                           | S13 |
| <b>Figure S11:</b> The representative conformations of the most-populated microstates of the A $\beta_{42}$ protofibril and A $\beta_{42}$ protofibril + rk10 complex are shown in the cartoon                                                                                                                                                                                                                                                                                                      | S14 |

representation with percentage populations in panel a, and b, respectively. The hydrogen bond and  $\pi$ - $\pi$  interactions observed in representative conformation extracted from the most-populated microstate ( $m_1$ ) of  $A\beta_{42}$  protofibril + rk10 complex are shown in panel c. The residues of chain A and chain B of  $A\beta_{42}$  protofibril participating in hydrogen bond and  $\pi$ - $\pi$  interactions are shown in cyan and green, respectively.

**Table S1:** Molecular docking analysis of rk10 with  $A\beta_{42}$  monomer. S15

**Table S2:** Molecular docking analysis of rk10 with  $A\beta_{42}$  monomer and protofibril structures using AutoDock Vina, Glide, and MVD. S16

**Table S3:** The secondary structure component statistics of dual simulation for  $A\beta_{42}$  monomer and  $A\beta_{42}$  monomer with rk10. S17

**Table S4:** Molecular docking analysis of rk10 with  $A\beta_{42}$  protofibril. S18

**Table S5:** The interchain binding free energy (in kcal/mol) of the  $A\beta_{42}$  protofibril in the absence and presence of rk10. The energy values are averaged over the three pairs of neighbouring chains (*i.e.*, chain A-B, chain B-C and chain C-D). S19

**Table S6:** The interchain (*i.e.*, chain A-B, chain B-C and chain C-D) binding free energy (in kcal/mol) of the  $A\beta_{42}$  protofibril in the absence and presence of rk10. S20

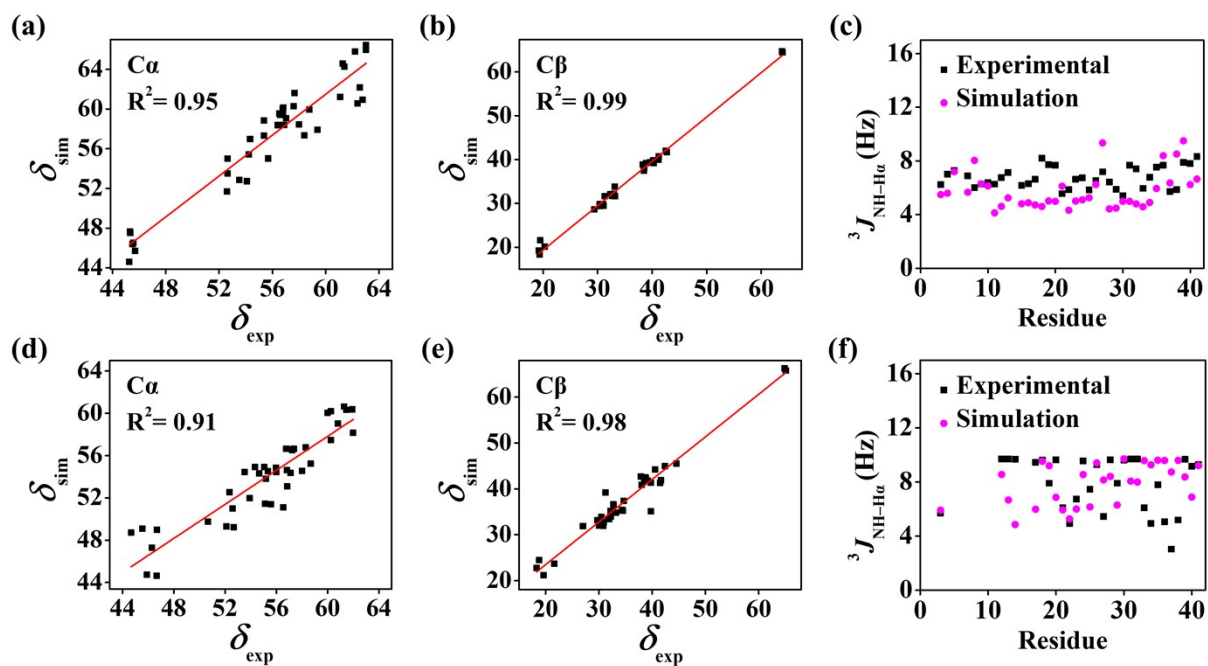

**Figure S1:** Comparison of NMR data obtained from simulation ( $\delta_{sim}$ ) with experimental ( $\delta_{exp}$ ) for (a)  $C\alpha$  chemical shift, (b)  $C\beta$  chemical shift, (c)  $^3J_{NH-H\alpha}$  coupling constants of  $A\beta_{42}$  monomer, and (d)  $C\alpha$  chemical shift, (e)  $C\beta$  chemical shift, (f)  $^3J_{NH-H\alpha}$  coupling constants of  $A\beta_{42}$  protofibril.

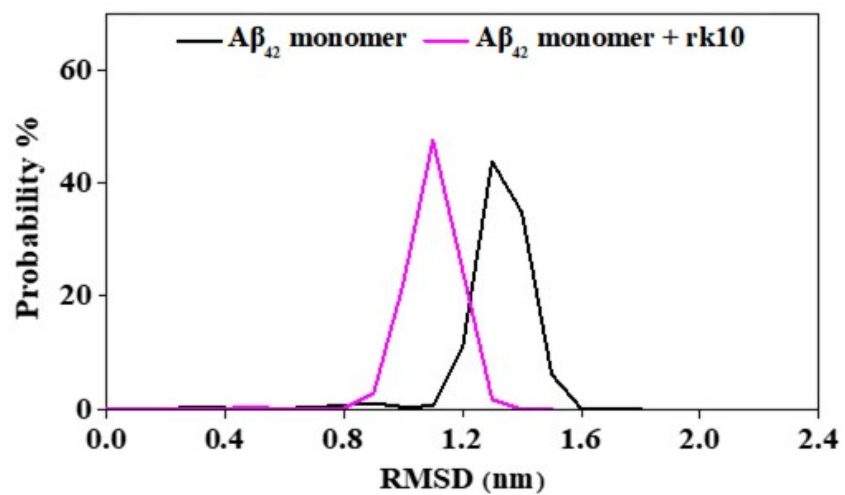

**Figure S2:** The probability distribution graph of RMSD for Aβ<sub>42</sub> monomer and Aβ<sub>42</sub> monomer + rk10 complex.

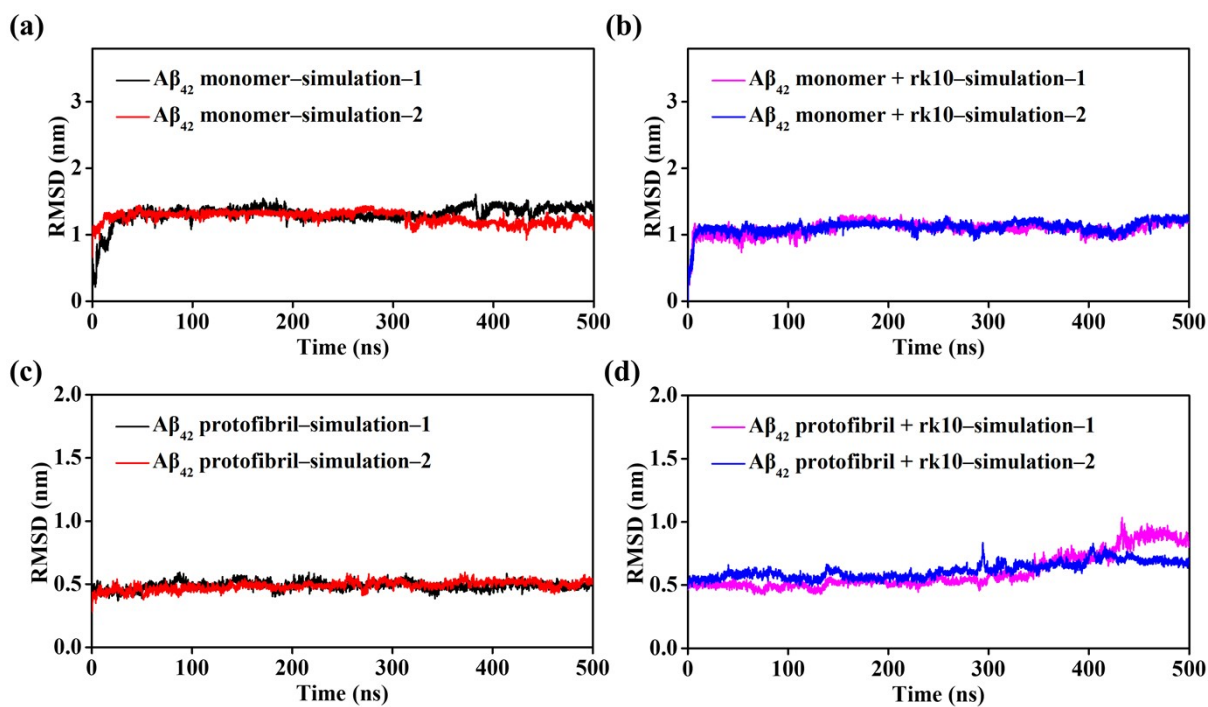

**Figure S3:** The RMSD of dual simulations for Aβ<sub>42</sub> monomer, Aβ<sub>42</sub> monomer + rk10 complex, Aβ<sub>42</sub> protofibril, and Aβ<sub>42</sub> protofibril + rk10 complex are shown in panel a, b, c, and d, respectively.

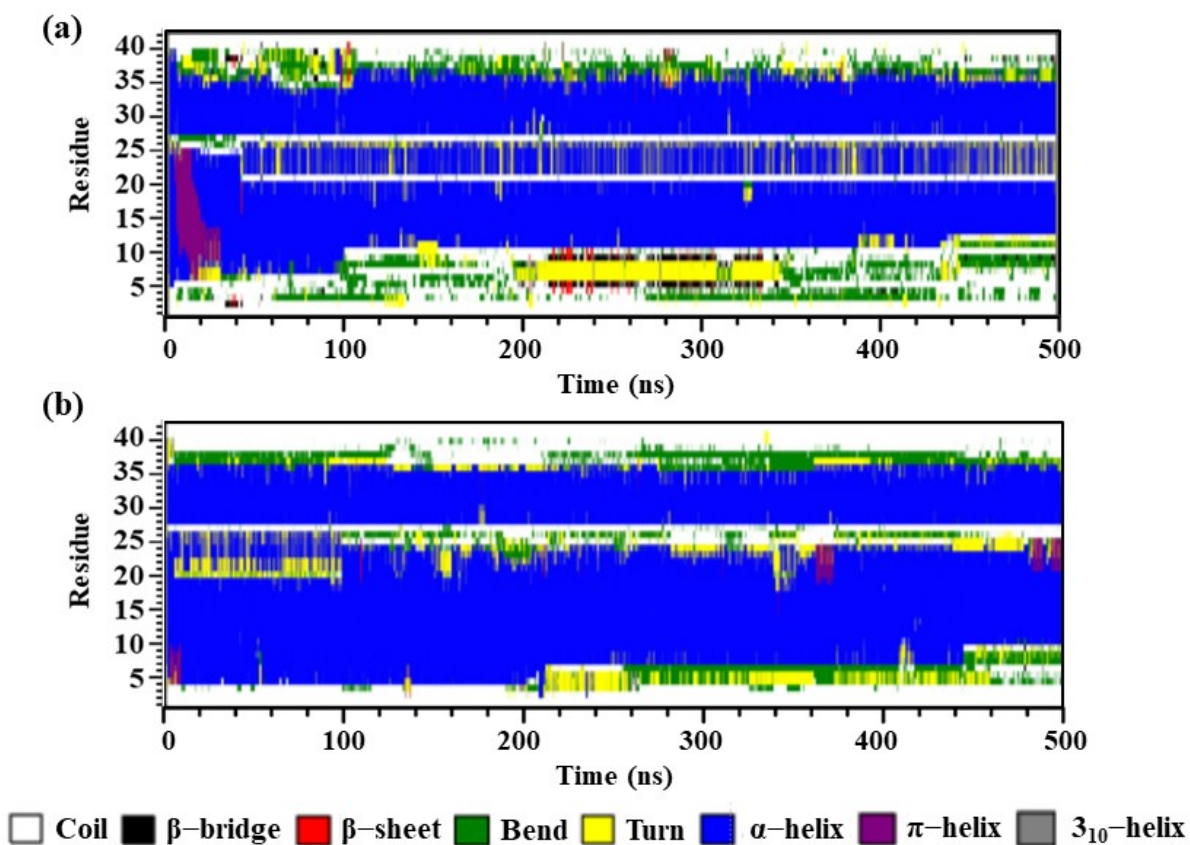

**Figure S4:** The evolution of secondary structure for Aβ<sub>42</sub> monomer (panel a) and Aβ<sub>42</sub> monomer + rk10 complex (panel b) during simulation. The X-axis represents simulation time in ns and Y-axis represents Aβ<sub>42</sub> residues. The colour-coded maps of secondary structure analysis for Aβ<sub>42</sub> monomer is shown underneath.

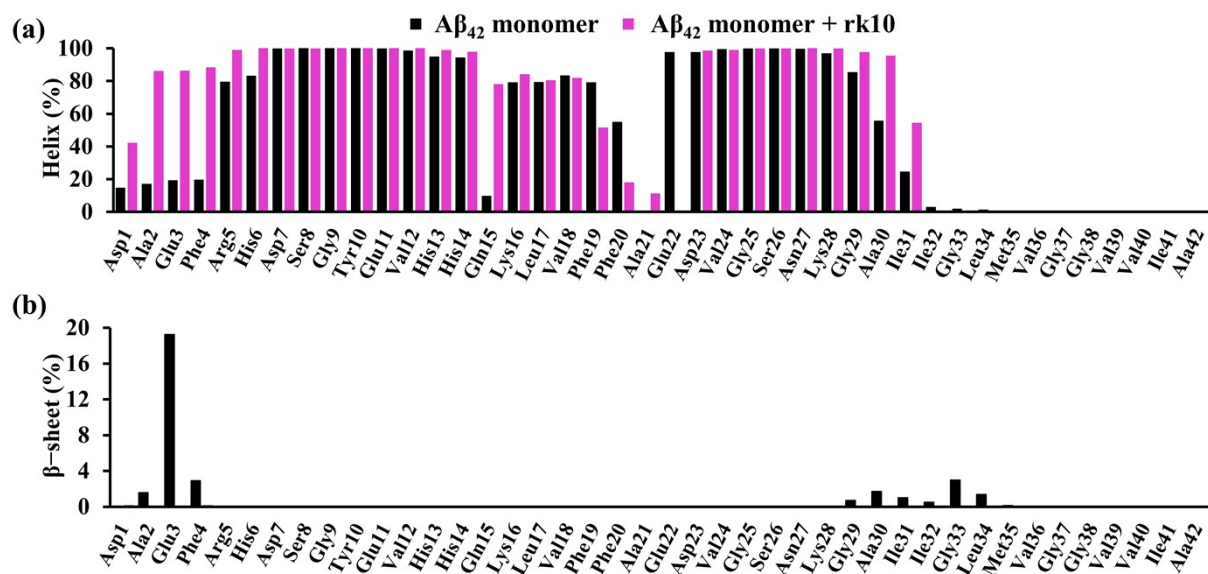

**Figure S5:** The per-residue helix,  $\beta$ -sheet percentage in  $A\beta_{42}$  monomer and  $A\beta_{42}$  monomer + rk10 complex are shown in panel a, and b, respectively.



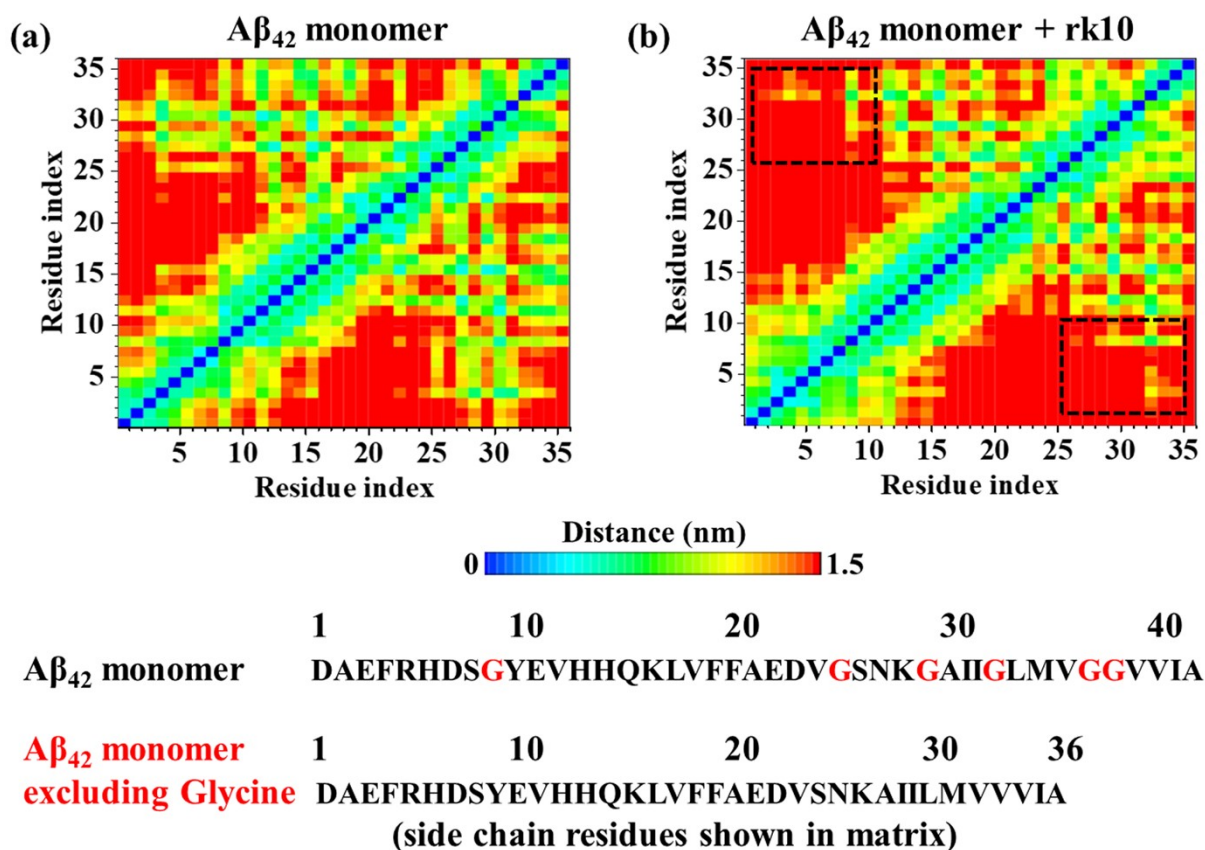

**Figure S6:** The side chain-side chain contact maps between  $A\beta_{42}$  monomer residues in the absence and presence of rk10 are shown in panel a, and b, respectively. In the presence of rk10, the contacts between Asp1–Val12 and Ser26–Ile41 residues of  $A\beta_{42}$  monomer were significantly reduced as depicted with dotted rectangular boxes in panel b.

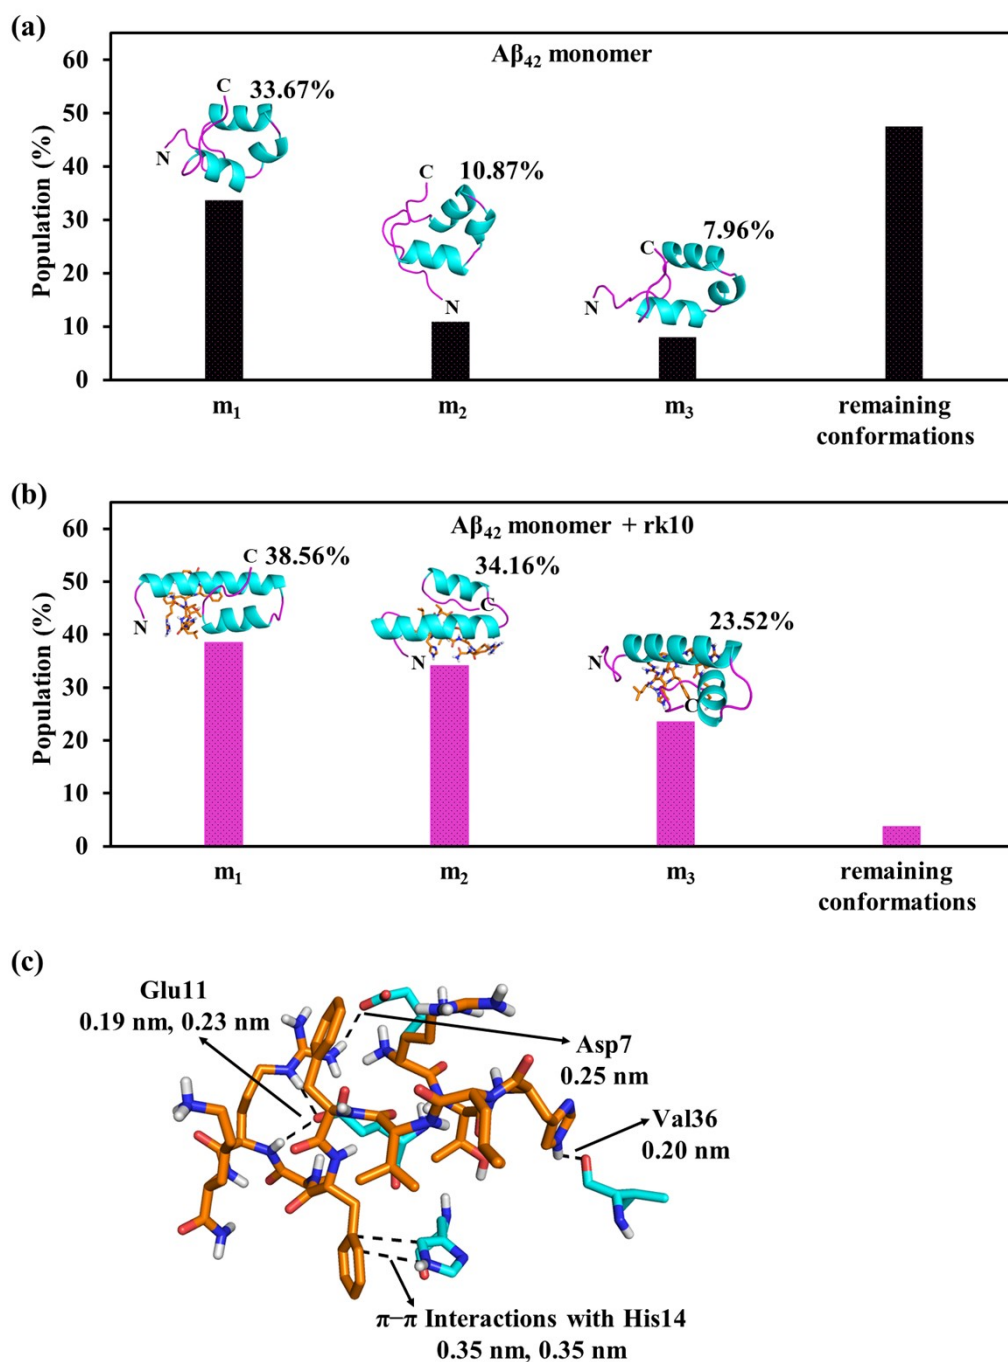

**Figure S7:** The representative conformations of the most-populated microstates of A $\beta$ <sub>42</sub> monomer and A $\beta$ <sub>42</sub> monomer + rk10 complex are shown in the cartoon representation with percentage populations in panel a, and b, respectively. The hydrogen bond and  $\pi$ - $\pi$  interactions between A $\beta$ <sub>42</sub> monomer and rk10 in the representative conformation of the most-populated microstate (m<sub>1</sub>) of A $\beta$ <sub>42</sub> monomer + rk10 complex are shown in panel c.

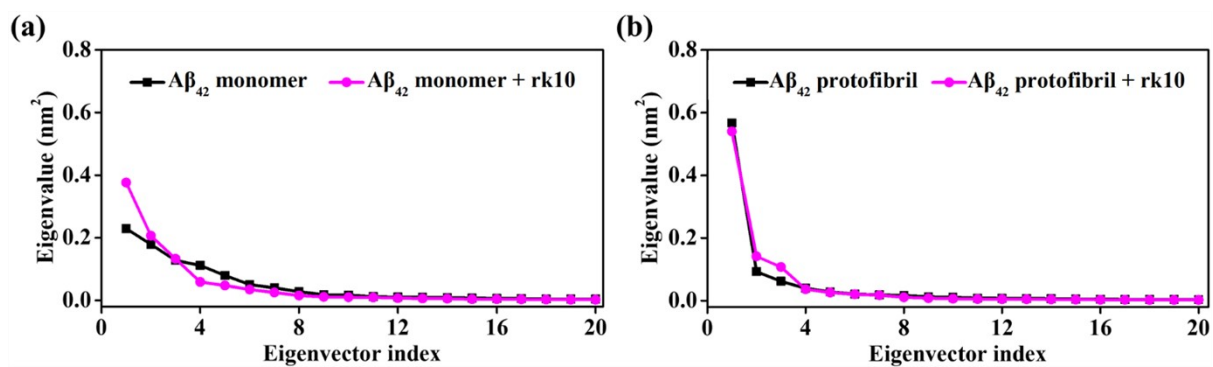

**Figure S8:** The eigenvalues for the corresponding eigenvectors obtained from the principal component analysis of Aβ<sub>42</sub> monomer (panel a) and protofibril (panel b) structures in the absence and presence of rk10.

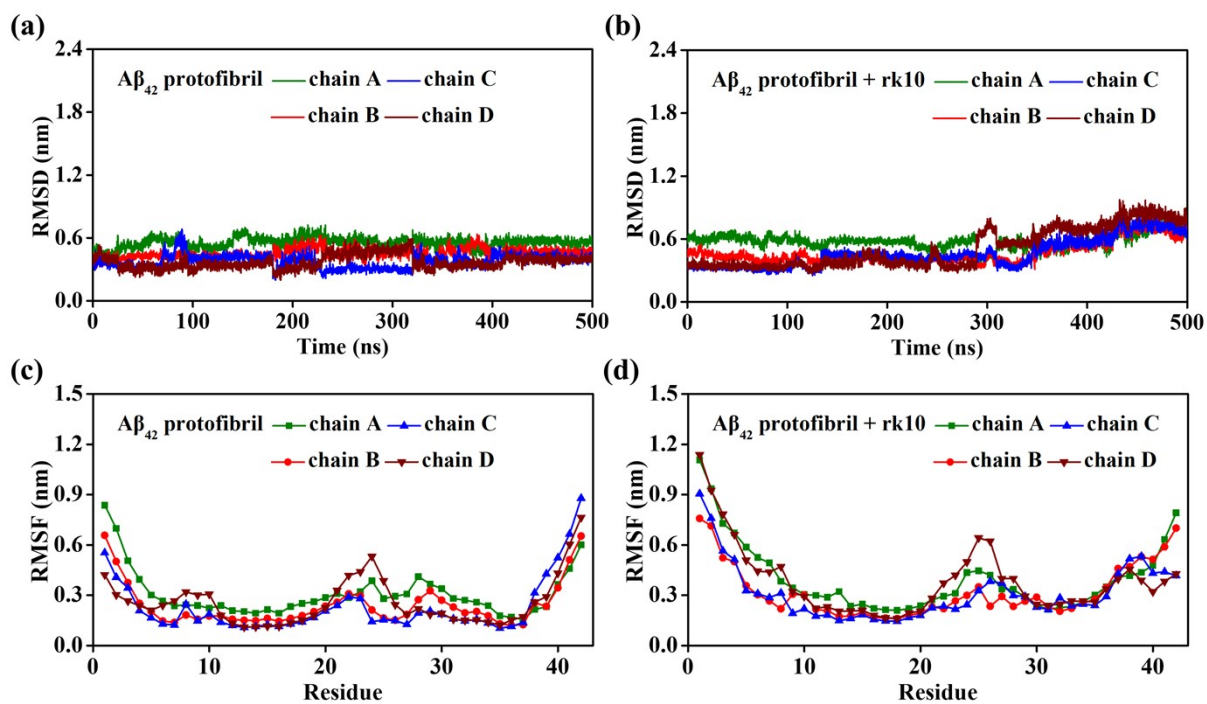

**Figure S9:** The RMSD for all four chains (A–D) of A $\beta$ <sub>42</sub> protofibril and A $\beta$ <sub>42</sub> protofibril + rk10 complex are shown in panel a, and b, respectively. The RMSF for all four chains (A–D) of A $\beta$ <sub>42</sub> protofibril in the absence and presence of rk10 are shown in panel c, and d, respectively.

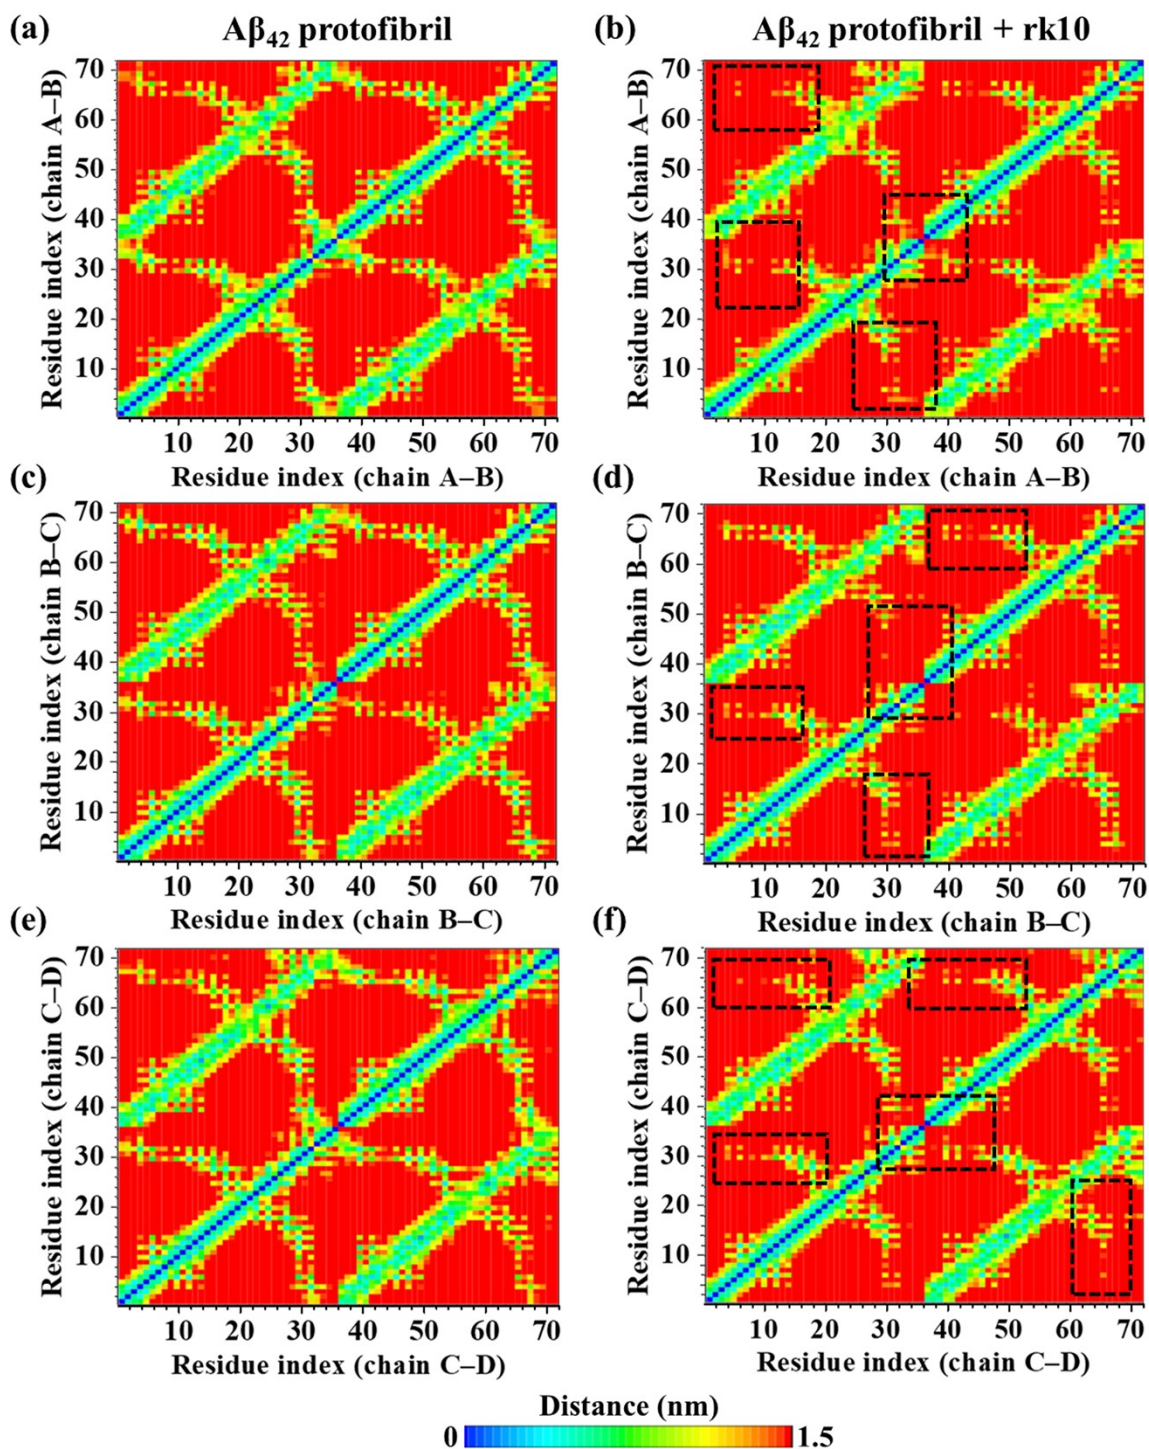

**Figure S10:** The side chain-side chain contact maps between  $A\beta_{42}$  protofibril chains in the absence and presence of rk10. The cut-off distance between atoms used to define contact is 1.5 nm. In the presence of rk10, the strong tertiary contacts between  $A\beta_{42}$  protofibril residues were disrupted as depicted with dotted rectangular boxes.



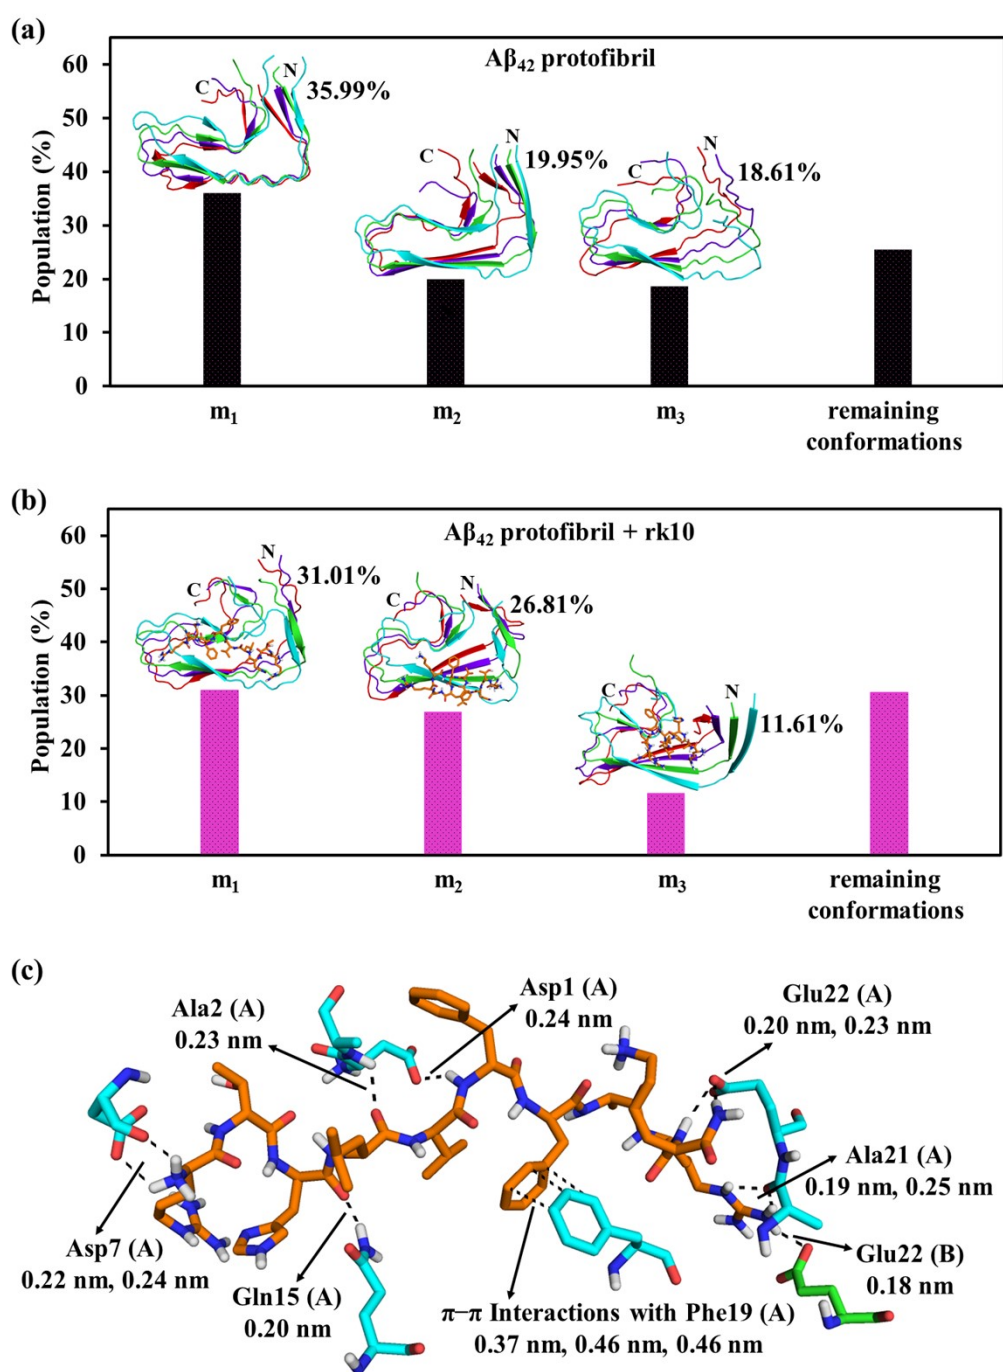

**Figure S11:** The representative conformations of the most-populated microstates of the Aβ<sub>42</sub> protofibril and Aβ<sub>42</sub> protofibril + rk10 complex are shown in the cartoon representation with percentage populations in panel a, and b, respectively. The hydrogen bond and π-π interactions observed in representative conformation extracted from the most-populated microstate (m<sub>1</sub>) of Aβ<sub>42</sub> protofibril + rk10 complex are shown in panel c. The residues of chain A and chain B of Aβ<sub>42</sub> protofibril participating in hydrogen bond and π-π interactions are shown in cyan and green, respectively.

**Table S1:** Molecular docking analysis of rk10 with A $\beta$ <sub>42</sub> monomer.

| Peptide  | Protein structure <sup>a</sup>  | AutoDock binding energy (kcal/mol) | A $\beta$ <sub>42</sub> residues involved in the intermolecular H-bonding interactions |                   |               | A $\beta$ <sub>42</sub> residues involved in intermolecular hydrophobic contacts |
|----------|---------------------------------|------------------------------------|----------------------------------------------------------------------------------------|-------------------|---------------|----------------------------------------------------------------------------------|
|          |                                 |                                    | Residue                                                                                | Atom <sup>b</sup> | Distance (nm) |                                                                                  |
| rk10     | A $\beta$ <sub>42</sub> monomer | -5.3                               | Glu3                                                                                   | NH: O             | 0.23          | Glu3, His6, Asp7, Ser8, Tyr10, Glu11, Val12, His14, Gln15, Phe19                 |
|          |                                 |                                    |                                                                                        | His6              | NH: O         |                                                                                  |
|          |                                 |                                    |                                                                                        |                   | NH: O         |                                                                                  |
|          |                                 |                                    | Glu11                                                                                  | OH: OE1           | 0.19          |                                                                                  |
|          |                                 |                                    |                                                                                        | NH: OE1           | 0.23          |                                                                                  |
|          |                                 |                                    |                                                                                        | NH: OE2           | 0.22          |                                                                                  |
|          |                                 |                                    | Gln15                                                                                  | NH: OE1           | 0.23          |                                                                                  |
|          |                                 |                                    |                                                                                        | CO: 1HE2          | 0.23          |                                                                                  |
|          |                                 |                                    |                                                                                        | CO: 1HE2          | 0.25          |                                                                                  |
| CO: 2HE2 | 0.25                            |                                    |                                                                                        |                   |               |                                                                                  |

<sup>a</sup>The PDB ID for A $\beta$ <sub>42</sub> monomer used in the present study is 1IYT. <sup>b</sup>The atoms on left represent ligand atoms and on the right represent A $\beta$ <sub>42</sub> residue atoms.

**Table S2:** Molecular docking analysis of rk10 with A $\beta$ <sub>42</sub> monomer and protofibril structures using AutoDock Vina, Glide, and MVD.

|                                                                    | AutoDock Vina                                                                                                                                            | Glide                                                                                                        | MVD                                                                                                          |
|--------------------------------------------------------------------|----------------------------------------------------------------------------------------------------------------------------------------------------------|--------------------------------------------------------------------------------------------------------------|--------------------------------------------------------------------------------------------------------------|
| <b>A<math>\beta</math><sub>42</sub> monomer + rk10 complex</b>     |                                                                                                                                                          |                                                                                                              |                                                                                                              |
| Binding energy (kcal/mol)                                          | -5.3                                                                                                                                                     | -5.0                                                                                                         | -15.3                                                                                                        |
| Hydrogen bonds                                                     | Glu3, His6, Glu11, Gln15                                                                                                                                 | Glu11, Gln15                                                                                                 | Glu3, His6, Asp7, Gln15                                                                                      |
| Hydrophobic contacts                                               | Glu3, His6, Asp7, Ser8, Tyr10, Glu11, Val12, His14, Gln15, Phe19                                                                                         | Asp7, Val12, His14, Lys16, Phe19, Phe20, Asp23                                                               | Glu3, Phe4, His6, Asp7, Tyr10, Glu11, Val12, Gln15, Phe19, Phe20                                             |
| <b>A<math>\beta</math><sub>42</sub> protofibril + rk10 complex</b> |                                                                                                                                                          |                                                                                                              |                                                                                                              |
| Binding energy (kcal/mol)                                          | -6.9                                                                                                                                                     | -7.4                                                                                                         | -30.3                                                                                                        |
| Hydrogen bonds                                                     | Val18 (A), Phe20 (A), Glu22 (A), Ala30 (A)                                                                                                               | Val18 (A), Phe20 (A), Glu22 (A), Ala30 (A), Ile32 (A)                                                        | Phe20 (A), Glu22 (A), Asp23 (A), Ala30 (A),                                                                  |
| Hydrophobic contacts                                               | Lys16 (A), Leu17 (A), Val18 (A), Phe19 (A), Phe20 (A), Ala21 (A), Glu22 (A), Asp23 (A), Val24 (A), Asn27 (A), Lys28 (A), Ala30 (A), Ile31 (A), Ile32 (A) | Leu17 (A), Val18 (A), Phe19 (A), Ala21 (A), Asp23 (A), Asn27 (A), Gly29 (A), Ile31 (A), Val40 (A), Ala42 (A) | Phe19 (A), Phe20 (A), Glu22 (A), Asp23 (A), Asn27 (A), Lys28 (A), Gly29 (A), Ala30 (A), Ile31 (A), Ala42 (A) |



**Table S3:** The secondary structure component statistics of dual simulation for A $\beta_{42}$  monomer and A $\beta_{42}$  monomer with rk10.

| System                           | Simulation | Secondary structure component % |                             |                 |                |                |
|----------------------------------|------------|---------------------------------|-----------------------------|-----------------|----------------|----------------|
|                                  |            | Helix <sup>a</sup>              | $\beta$ -sheet <sup>b</sup> | Coil            | Bend           | Turn           |
| A $\beta_{42}$ monomer           | 1          | 54.6 $\pm$ 1.59                 | 1.2 $\pm$ 0.66              | 27 $\pm$ 1.52   | 9 $\pm$ 0.75   | 8.2 $\pm$ 0.71 |
|                                  | 2          | 50.4 $\pm$ 4.07                 | 2.2 $\pm$ 0.44              | 28.2 $\pm$ 1.66 | 13 $\pm$ 2.38  | 6.2 $\pm$ 0.52 |
| A $\beta_{42}$ monomer<br>+ rk10 | 1          | 62.6 $\pm$ 1.46                 | 0 $\pm$ 0                   | 22.4 $\pm$ 0.88 | 8.2 $\pm$ 1.24 | 6.8 $\pm$ 0.44 |
|                                  | 2          | 58.6 $\pm$ 2.43                 | 0.2 $\pm$ 0.18              | 22.6 $\pm$ 1.59 | 9.2 $\pm$ 1.48 | 9.4 $\pm$ 1.08 |

<sup>a</sup>Helix=  $\alpha$ -helix +  $\pi$ -helix +  $3_{10}$ -helix; <sup>b</sup> $\beta$ -sheet=  $\beta$ -strand +  $\beta$ -bridge

**Table S4:** Molecular docking analysis of rk10 with A $\beta$ <sub>42</sub> protofibril.

| Peptide | Protein structure <sup>a</sup>      | AutoDock binding energy (kcal/mol) | A $\beta$ <sub>42</sub> residues involved in intermolecular hydrogen bonding |                   |               | A $\beta$ <sub>42</sub> residues involved in intermolecular hydrophobic contacts                                                                         |
|---------|-------------------------------------|------------------------------------|------------------------------------------------------------------------------|-------------------|---------------|----------------------------------------------------------------------------------------------------------------------------------------------------------|
|         |                                     |                                    | Residue                                                                      | Atom <sup>b</sup> | Distance (nm) |                                                                                                                                                          |
| rk10    | A $\beta$ <sub>42</sub> protofibril | -6.9                               | Val18 (A)                                                                    | NH: O             | 0.19          | Lys16 (A), Leu17 (A), Val18 (A), Phe19 (A), Phe20 (A), Ala21 (A), Glu22 (A), Asp23 (A), Val24 (A), Asn27 (A), Lys28 (A), Ala30 (A), Ile31 (A), Ile32 (A) |
|         |                                     |                                    | Phe20 (A)                                                                    | O: NH             | 0.23          |                                                                                                                                                          |
|         |                                     |                                    |                                                                              | NH: O             | 0.26          |                                                                                                                                                          |
|         |                                     |                                    | Glu22 (A)                                                                    | NH: O             | 0.30          |                                                                                                                                                          |
|         |                                     |                                    | Ala30 (A)                                                                    | NH: O             | 0.24          |                                                                                                                                                          |
|         | NH: O                               | 0.24                               |                                                                              |                   |               |                                                                                                                                                          |

<sup>a</sup>The PDB ID for A $\beta$ <sub>42</sub> protofibril used in the present study is 5OQV. <sup>b</sup>The atoms on left represent ligand atoms and on the right represent A $\beta$ <sub>42</sub> residue atoms.

**Table S5:** The interchain binding free energy (in kcal/mol) of the A $\beta$ <sub>42</sub> protofibril in the absence and presence of rk10. The energy values are averaged over the three pairs of neighbouring chains (*i.e.*, chain A–B, chain B–C and chain C–D).

| Energy components      | Binding free energy (kcal/mol)      |                                            |
|------------------------|-------------------------------------|--------------------------------------------|
|                        | A $\beta$ <sub>42</sub> protofibril | A $\beta$ <sub>42</sub> protofibril + rk10 |
| $\Delta E_{vdW}$       | $-154.3 \pm 7.0$                    | $-141.3 \pm 6.9$                           |
| $\Delta E_{elec}$      | $13.2 \pm 0.5$                      | $-7.4 \pm 5.9$                             |
| $\Delta E_{MM}^a$      | $-141.1 \pm 7.5$                    | $-148.7 \pm 12.8$                          |
| $\Delta G_{ps}$        | $142.4 \pm 25.5$                    | $155.9 \pm 22.3$                           |
| $\Delta G_{nps}$       | $-149.6 \pm 11.7$                   | $-142.3 \pm 11.9$                          |
| $\Delta G_{solv}^b$    | $-7.2 \pm 13.8$                     | $13.6 \pm 10.4$                            |
| $\Delta G_{binding}^c$ | $-148.3 \pm 21.3$                   | $-135.1 \pm 2.4$                           |

$$^a\Delta E_{MM} = \Delta E_{vdW} + \Delta E_{elec}; \quad ^b\Delta G_{solv} = \Delta G_{ps} + \Delta G_{nps}; \quad ^c\Delta G_{binding} = \Delta E_{MM} + \Delta G_{solv}$$

**Table S6:** The interchain (*i.e.*, chain A–B, chain B–C and chain C–D) binding free energy (in kcal/mol) of the A $\beta$ <sub>42</sub> protofibril in the absence and presence of rk10.

| Systems                                          | Chain | $\Delta E_{\text{vdw}}$ | $\Delta E_{\text{elec}}$ | $\Delta E_{\text{MM}}^{\text{a}}$ | $\Delta G_{\text{ps}}$ | $\Delta G_{\text{nps}}$ | $\Delta G_{\text{solv}}^{\text{b}}$ | $\Delta G_{\text{binding}}^{\text{c}}$ |
|--------------------------------------------------|-------|-------------------------|--------------------------|-----------------------------------|------------------------|-------------------------|-------------------------------------|----------------------------------------|
| A $\beta$ <sub>42</sub><br>protofibril           | A–B   | -153.2 ± 7.4            | -13.7 ± 30.2             | -166.9 ± 37.6                     | 157.7 ± 36.9           | -151.8 ± 13.3           | 5.9 ± 23.6                          | -161.0 ± 14.0                          |
|                                                  | B–C   | -153.2 ± 6.7            | 52.2 ± 18.2              | -101.0 ± 11.5                     | 123.4 ± 23.1           | -145.7 ± 11.2           | -22.3 ± 11.9                        | -123.3 ± 23.4                          |
|                                                  | C–D   | -156.4 ± 7.0            | 1.1 ± 13.6               | -155.3 ± 6.6                      | 146.2 ± 16.6           | -151.2 ± 10.7           | -5.0 ± 5.9                          | -160.3 ± 12.5                          |
| A $\beta$ <sub>42</sub><br>protofibril<br>+ rk10 | A–B   | -127.9 ± 7.1            | -30.7 ± 18.4             | -158.6 ± 25.5                     | 176.3 ± 21.0           | -134.9 ± 12.9           | 41.4 ± 8.1                          | -117.2 ± 17.4                          |
|                                                  | B–C   | -143.4 ± 6.9            | 6.9 ± 16.6               | -136.5 ± 9.7                      | 136.3 ± 23.6           | -142.8 ± 11.6           | -6.5 ± 12.0                         | -143.0 ± 21.7                          |
|                                                  | C–D   | -152.7 ± 6.7            | 1.6 ± 19.4               | -151.1 ± 12.7                     | 155.2 ± 22.3           | -149.1 ± 11.2           | 6.1 ± 11.1                          | -145.0 ± 1.6                           |

<sup>a</sup> $\Delta E_{\text{MM}} = \Delta E_{\text{vdw}} + \Delta E_{\text{elec}}$ ; <sup>b</sup> $\Delta G_{\text{solv}} = \Delta G_{\text{ps}} + \Delta G_{\text{nps}}$ ; <sup>c</sup> $\Delta G_{\text{binding}} = \Delta E_{\text{MM}} + \Delta G_{\text{solv}}$
